RESEARCH ARTICLE

# De Novo Transcriptome Assembly and Comparative Analysis Elucidate Complicated Mechanism Regulating *Astragalus chrysochlorus* Response to Selenium Stimuli

Özgür Çakır<sup>1,3\*</sup>, Neslihan Turgut-Kara<sup>1</sup>, Şule Arı<sup>1,2</sup>, Baohong Zhang<sup>3</sup>

**1** Department of Molecular Biology and Genetics, Faculty of Science, Istanbul University, 34134 Vezneciler Istanbul, Turkey, **2** Research and Application Center for Biotechnology and Genetic Engineering, Istanbul University, 34134, Istanbul, Turkey, **3** Department of Biology, East Carolina University, Greenville, NC 27858, United States of America

\* [ozgurckr@istanbul.edu.tr](mailto:ozgurckr@istanbul.edu.tr)

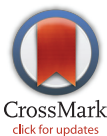

**OPEN ACCESS**

**Citation:** Çakır Ö, Turgut-Kara N, Arı Ş, Zhang B (2015) De Novo Transcriptome Assembly and Comparative Analysis Elucidate Complicated Mechanism Regulating *Astragalus chrysochlorus* Response to Selenium Stimuli. PLoS ONE 10(10): e0135677. doi:10.1371/journal.pone.0135677

**Editor:** Xianlong Zhang, National Key Laboratory of Crop Genetic Improvement, CHINA

**Received:** June 16, 2015

**Accepted:** July 26, 2015

**Published:** October 2, 2015

**Copyright:** © 2015 Çakır et al. This is an open access article distributed under the terms of the [Creative Commons Attribution License](https://creativecommons.org/licenses/by/4.0/), which permits unrestricted use, distribution, and reproduction in any medium, provided the original author and source are credited.

**Data Availability Statement:** The raw data of *A. chrysochlorus* RNA-seq were deposited in NCBI Gene Expression Omnibus (GEO) database (accession number: GSE71097).

**Funding:** This work was supported by the Research Fund of The Istanbul University, Project No: 39427. O. Çakır received financial support from TUBITAK-BIDEB 2219-International Postdoctoral Research Fellowship Programme for this study.

**Competing Interests:** The authors have declared that no competing interests exist.

## Abstract

*Astragalus* species are medicinal plants that are used in the world for years. Some *Astragalus* species are known for selenium accumulation and tolerance and one of them is *Astragalus chrysochlorus*, a secondary selenium accumulator. In this study, we employed Illumina deep sequencing technology for the first time to *de novo* assemble *A. chrysochlorus* transcriptome and identify the differentially expressed genes after selenate treatment. Totally, 59,656 unigenes were annotated with different databases and 53,960 unigenes were detected in NR database. Transcriptome in *A. chrysochlorus* is closer to *Glycine max* than other plant species with 43,1 percentage of similarity. Annotated unigenes were also used for gene ontology enrichment and pathway enrichment analysis. The most significant genes and pathways were ABC transporters, plant pathogen interaction, biosynthesis of secondary metabolites and carbohydrate metabolism. Our results will help to enlighten the selenium accumulation and tolerance mechanisms, respectively in plants.

## Introduction

*Astragalus* species have hepatoprotective, antioxidative, immunostimulative and antiviral properties and because of these properties they are being consumed in the world [1]. These properties also led to efforts to illuminate chemical contents of *Astragalus* plants and they have gained economical and medicinal values [2, 3]. *Astragalus* genus is a member of Leguminosae and also is famous for accumulation of high levels of selenium [4, 5]. *Astragalus bisulcatus* is a well-studied plant that accumulates selenium in high level as well as 0.65% in its tissues [6]. Among the *Astragalus* species, the Turkish endemic *A. chrysochlorus* has been proved to be one of secondary selenium accumulators [7]. In our previous study, SMT (selenocysteine

methyltransferase) which is known to be an essential enzyme in Se (selenium) metabolism, has been isolated from *A. chrysochlorus* [8]. Additionally, the potential roles of microRNAs (miRNAs) in selenium stimuli were investigated in *A. chrysochlorus* [9].

It is known that most plants can not tolerate high levels of selenium. However, some plants can tolerate high concentrations and accumulate Se. Thus, it could be toxic for most of the plants. Selenium is known to be taken into cells by sulphate transporters because it resembles sulfur (S) and therefore it is metabolized in sulfur-related pathways. For bioremediation and biofortification studies, it is of necessity to know the details of accumulation of high levels of selenium and underlying mechanism. Se transportation and accumulation has become the focus of interest recently [10–14]. There is the necessity of new approaches that will enlighten the mechanisms underlying Se tolerance and accumulation. Identification of the genes and their expression profiling will help us to understand the mechanisms. Next generation sequencing is one of the strategies that could be used to investigate the transcriptome of a non-model plant in a certain condition. RNA-seq technologies provide a fast and cheaper solution to study the genetic information that organisms contain and this method is functional in non-model plant species when the genome information is unavailable, and the RNA-seq deals with the coding regions not the whole genome [15]. Currently, there is no report on deep sequencing assembly and genome-wide expression profile in *A. chrysochlorus*. This limits the application of *A. chrysochlorus* in biomedical field as well as the genetic improvement of this plant species for agricultural and medical purpose.

In this study, we aimed to identify essential genes and their expression under Se treatment. The RNA-seq was done to assemble *de novo* and annotate the transcriptome of *Astragalus chrysochlorus*. Bioinformatic tools were applied to investigate the pathways and genes that were expressed under Se treatment for better understanding Se tolerance and accumulation.

## Materials and Methods

### Plant material and culturing conditions

The callus cultures of *Astragalus chrysochlorus* used in this study were established and maintained as long-term previously [16]. Callus tissues were subcultured every three weeks. For selenium treatment, 21-day-old callus tissues were grown on MS medium supplemented with 5 mg/L sodium selenate for 3 weeks. Tissue culture tests were done using a growth chamber with fluorescent light illumination (ca. 1400 mol<sup>-2</sup> ms<sup>-1</sup>) over a 16/8 day and night at 25± 2°C. Control and selenium treatments were triplicated in five individual culture dishes, and each dish contained nine callus tissues. After 21 days, callus tissues were harvested and immediately frozen in liquid nitrogen and then stored in -80°C for RNA extraction.

### RNA Isolation

Total RNA was extracted using Qiagen total RNA isolation system (RNeasy Plant Mini Kit, 74904, Qiagen) according to the manufacturer's protocol. RNAs quality and quantity were checked using a Nanodrop 2000 spectrophotometer (Nanodrop Technologies, USA). Total RNA was then used for library preparation and sequencing using Illumina HiSeq 2000 sequencing.

### Library Preparation and Sequencing

mRNA isolation, fragmentation, adapter ligation, cDNA library construction and sequencing were done by Beijing Genome Institute (BGI) (Shenzhen, China). Briefly, after checking the RNA quality and quantity, the mRNA was isolated using magnetic beads, then mRNAs were

fragmented using fragmentation buffer. These fragments were used as templates for cDNA synthesis. Single nucleotide A (adenine) was added to obtain short fragments. Adapters were ligated to short fragments, then PCR was performed. Illumina HiSeq 2000 was used to sequence the libraries.

## Sequencing Analysis

After the deep sequencing, raw reads with low quality were first eliminated. Transcriptome assembly of short reads were done by Trinity program (release-20130225, <http://trinityrnaseq.sourceforge.net/>) [17] operating with three individual modules (Inchworm, Chrysalis and Butterfly). These three softwares were run consecutively. The parameters for Trinity were—seq-  
Type fq—min\_contig\_length 100,—min\_glue 3—group\_pairs\_distance 250 and—  
path\_reinforcement\_distance 85—min\_kmer\_cov 3. The contigs that were obtained, joined together to get scaffolds. Then, the Gene Indices Clustering Tools (TGICL, version 2.1) [18] were used to form unigenes and Phrap (Release 23.0) (<http://www.phrap.org/>) was used to assemble scaffolds to cluster the scaffolds [19]. After all, assembled transcriptome sequences of *Astragalus chrysochlorus* were obtained. The unigenes were subjected to blastx alignment (evalue < 0.00001) in NR, Swiss-Prot, KEGG and COG databases. The results from these alignments were used to decide the direction of sequences. Lastly, the sequences which do not be aligned to any database were subjected to ESTScan [20]. For function annotation, Blast was used (v2.2.26+x64-linux) against NT (NCBI nucleotide database, release-20130408), NR (non-redundant protein sequence database, release-20130408), KEGG (Kyoto Encyclopedia of Genes and Genomes, Release 63.0), Swiss-Prot (release-2013\_03) and COG (Clusters of Orthologous Groups, release-20090331) databases. To determine the unigene GO annotation, NR annotation was used. Blast2GO (<http://www.blast2go.com/b2ghome>, release 2012-08-01) [21] program was run to get the gene ontology. Expression profiling of unigenes were done. The reads were mapped to reference transcriptome by SOAP (Release 2.21, <http://soap.genomics.org.cn/soapaligner.html>), using the parameters “-m 0-x 500-s 40-l 35-v 5-r 1”. FPKM (Fragments Per kb per Million reads) method was done. With this method, it is possible to eliminate the effect of different gene length. Thus, it is possible to compare the expression level of a gene in different samples. RPKM was calculated according to the unigenes length and read number mapped to this gene [22]. Statistical analysis was done to compare different libraries. False discovery rate (FDR) was calculated to specify the p-value threshold in expression analysis. If the FDR is smaller and the fold change is bigger, it means that the expression difference between the two samples is bigger. The criteria were used as  $FDR \leq 0.001$  and fold change (Se treated/not treated)  $\geq 1$  or  $\leq -1$ . Lastly, GO and KEGG pathway analysis were done for the differentially expressed genes according to the description above.

## Results

The raw data of *A. chrysochlorus* RNA-seq were deposited in NCBI Gene Expression Omnibus (GEO) database (accession number: GSE71097). We obtained a total of 108,123,354 raw reads from two libraries (control and selenium-treated) using paired-end sequencing on Illumina HiSeq 2000 platform. Totally, 9,358,590,780 clean nucleotide reads were generated from two libraries. From these reads, a total of 83,273 unigenes were assembled and identified with a total of 93,072,751 nt in length with an average of 1,118 nt. Then the numbers of unigenes were determined via function annotation analysis and length distribution sizes of *A. chrysochlorus* unigenes were calculated (Table 1 and S1 Fig). A total of 52,640 CDS were mapped to protein database. Total raw reads for control and Se-treated samples were similar with 53,984,240 and 54,139,114, respectively (Table 2). It was determined that the clean reads were more than 95%

**Table 1. Annotation results of *A. chrysochlorus* unigenes according to different databases.**

| Database   | Number of Unigene | Percentage |
|------------|-------------------|------------|
| NR         | 53,960            | 90         |
| NT         | 54,521            | 91         |
| Swiss-prot | 33,650            | 56         |
| KEGG       | 31,003            | 51         |
| COG        | 19,318            | 32         |
| GO         | 40,599            | 68         |

doi:10.1371/journal.pone.0135677.t001

in both samples. An average of 658,976-fold of sequencing depth was obtained (S1 and S2 Tables). The Q20 value of the reads were over 98% for both samples. Fig 1 summarizes the e-value similarity and species distribution. According to the NR database similarity search, it was found that 59.2 of the sequences showed high degree of similarity ( $< 1e^{-45}$ ), 40.8% of the sequences showed reasonable similarity (between  $1e^{-5}$  and  $1e^{-45}$ ). According to the similarity distribution, 40.1% of the sequences showed more than 80% similarity with the sequences in the database.

We also compared the transcriptome similarity between *A. chrysochlorus* and other closely-related plant species. A total of 43.1% of *A. chrysochlorus* transcriptome were matched to *Glycine max* (43.1%) followed by *Medicago truncatula* (39.7%) and *Lotus corniculatus* var. *japonicus* (9.6%), respectively. For the COG classification, a total of 35,175 genes were categorized into 25 classes (Fig 2). According to the number of genes, the most significant ones were general function (6,278), replication, recombination and repair (3,846), transcription (3,101), post-translational modification, protein turnover and chaperones (2,668) and signal transduction mechanisms (2,429). According to the Gene ontology analysis, unigenes were sorted into 55 categories (Fig 3). In biological process category, cellular process, metabolic process and single cell process ontologies were the top three gene ontology terms with the number of unigenes 25,641, 24,683 and 17,416, respectively. In the same category, biological adhesion, rhythmic process and locomotion were the last three GO terms with the number of unigenes 324, 233 and 31, respectively. In cellular component category, cell, cell part and organelle terms were the top three classes with 28,623, 28,622 and 23,094 unigenes. The last three categories were extracellular matrix part, extracellular region part and virion and virion part with the number of 26, 17, and 18, respectively. Lastly, for molecular function category, binding, catalytic activity and transporter activity were the top three GO terms with the number of unigenes 21,302, 20,560 and 2,578, respectively. The categories with the least three unigene numbers were metallochaperone activity (6), translation regulator activity (4) and protein tag (4), respectively. For KEGG analysis, 31,003 unigenes were annotated with the pathway analysis and it is determined that 3,549 of them were differentially expressed. These unigenes were annotated with 127 pathways according to KEGG analysis. The most significant unigene numbers that were detected, were listed in Fig 4. Metabolic pathways are the first category with 828 differentially expressed unigenes. Biosynthesis of secondary metabolites and plant-pathogen interaction are the second and third categories with 429 and 263 differentially expressed unigenes, respectively.

**Table 2. Sequencing statistics of Se-treated and untreated *A. chrysochlorus* callus tissues.**

| Samples    | Total Raw Reads | Total Clean Reads | Total Clean Nucleotides (nt) | Q20 percentage | N percentage | GC percentage |
|------------|-----------------|-------------------|------------------------------|----------------|--------------|---------------|
| Control    | 53,984,240      | 51,945,966        | 4,675,136,940                | 98.54%         | 0.00%        | 40.96%        |
| Se-treated | 54,139,114      | 52,038,376        | 4,683,453,840                | 98.49%         | 0.00%        | 41.74%        |

doi:10.1371/journal.pone.0135677.t002

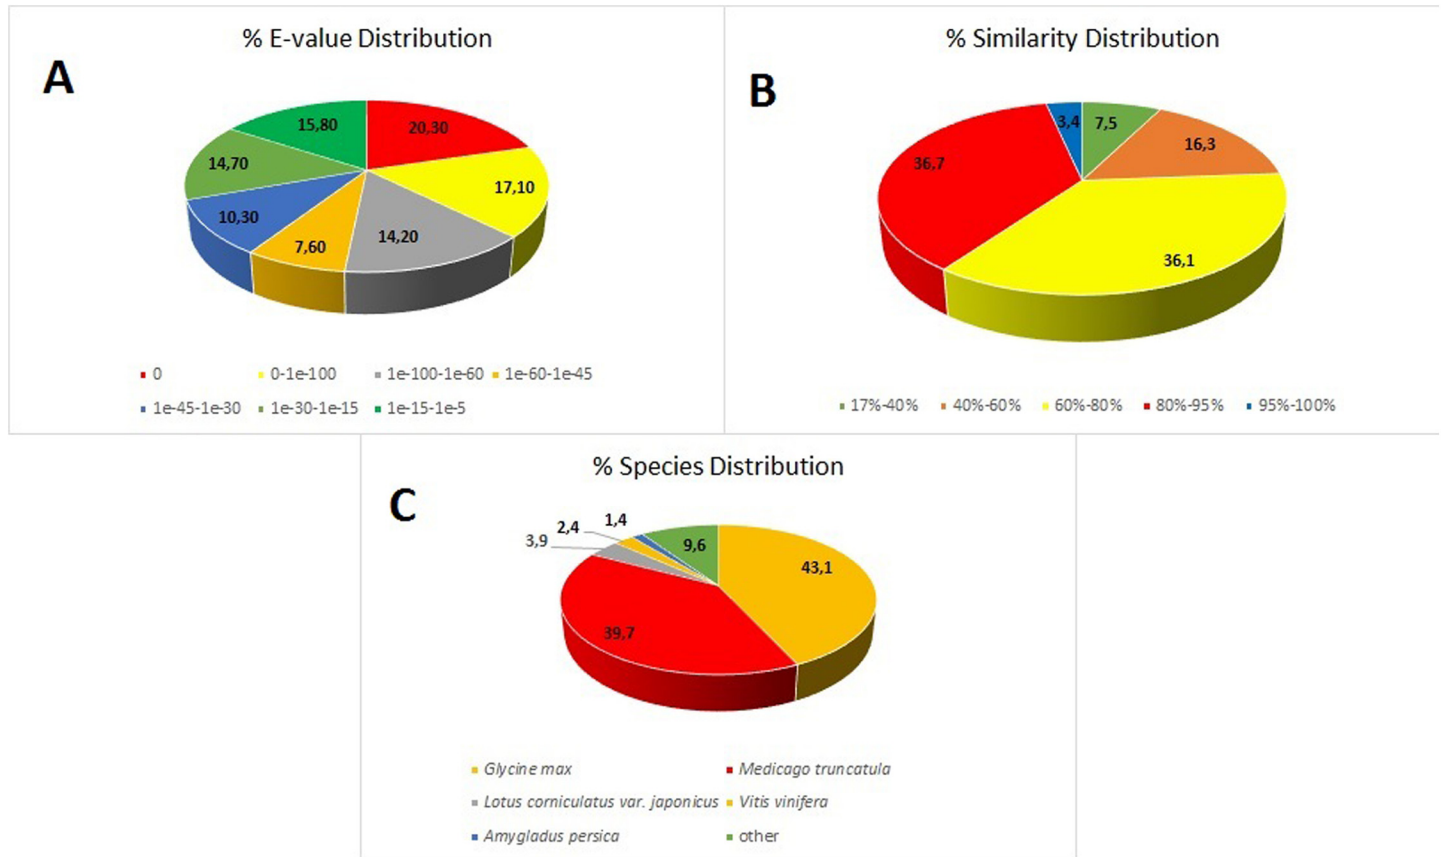

**Fig 1. Unigene annotation results according to the NR database.** (A) The E-value distribution. (B) The similarity distribution. (C) The species distribution.

doi:10.1371/journal.pone.0135677.g001

To understand the effect of Se treatment on gene expression in *A. chrysochlorus*, we studied the differentially expressed genes in control and Se-treated callus (Fig 5 and S3 Table). Se treatment significantly up-regulated the expression of 4,539 genes ( $FDR \leq 0.001$ ,  $\log_2 \text{ratio} \geq 1$ ). On the other hand, 3,838 genes were downregulated significantly by Se treatment ( $FDR \leq 0.001$ ,  $\log_2 \text{ratio} \geq -1$ ) (Fig 6). When we adjusted the fold change to  $\pm 2$ , 1311 genes were found to be upregulated and 912 were found to be downregulated. Among these 1311 upregulated and 912 downregulated genes, 663 of upregulated ones and 309 downregulated ones were annotated with nr database (S3 Table). We also did gene ontology analysis with the differentially expressed genes to investigate the mechanisms that these genes may belong to (Fig 7). These genes were classified into 59 categories (Fig 7). In biological process category, cellular process, metabolic process and single cell process ontologies were the most abundant categories with the number of unigenes 2887, 2830 and 2031, respectively. In cellular component terms, cell, cell part and organelle terms were again the top three categories with 3021, 3021 and 2331 unigenes. Finally, in molecular function category, binding, catalytic activity and transporter activity were the most abundant GO terms with the number of unigenes 2529, 2408 and 331, respectively. According to the KEGG analysis that performed differentially expressed genes, 20 pathways were determined.

COG Function Classification of All-Unigene.fa Sequence

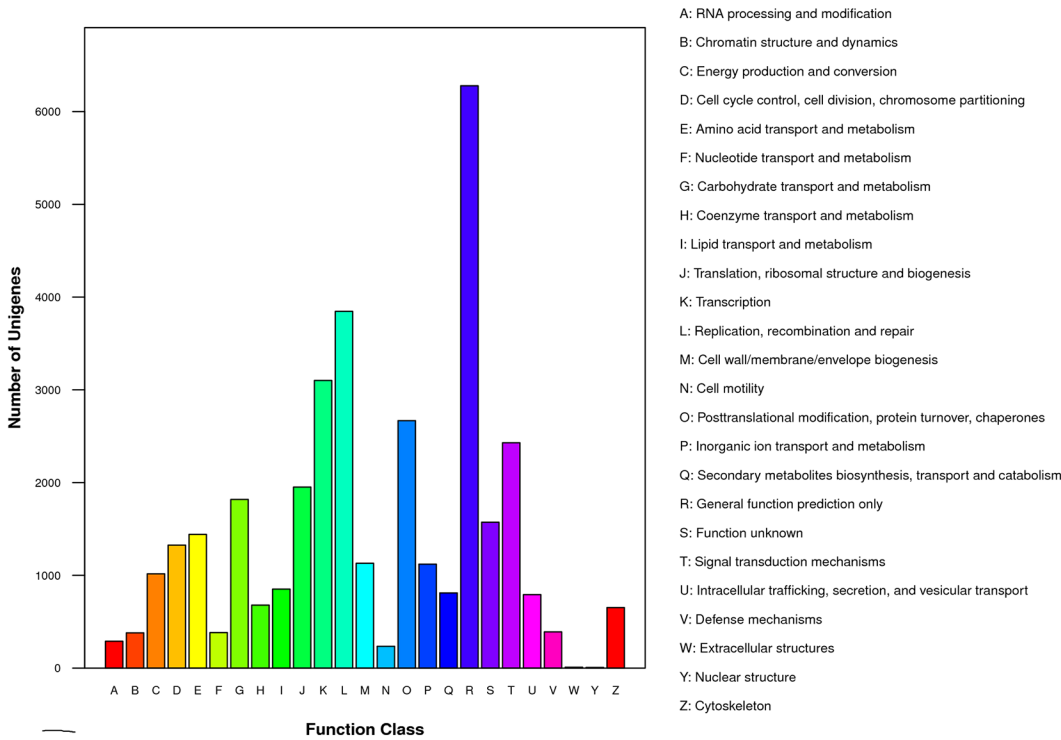

Fig 2. Functional classification of *A. chrysochlorus* unigenes according to COG database.

doi:10.1371/journal.pone.0135677.g002

All-Unigene GO Classification

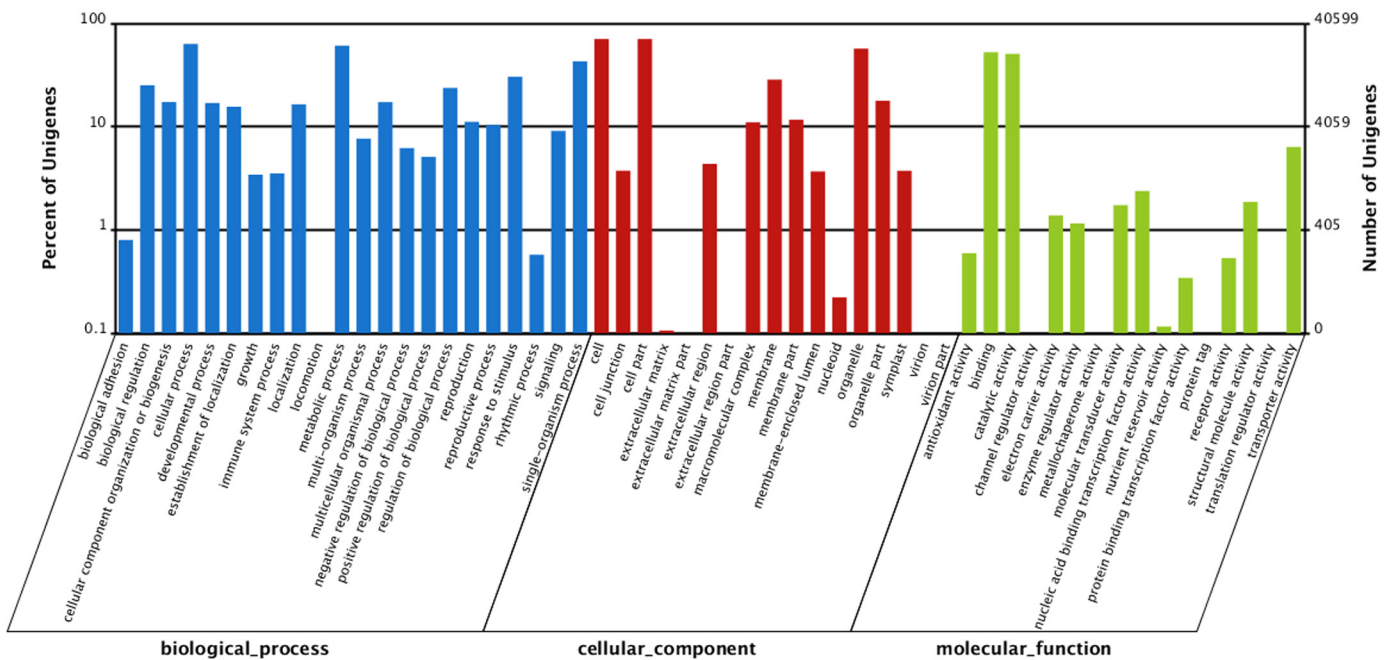

Fig 3. GO functional classification of *A. chrysochlorus* unigenes.

doi:10.1371/journal.pone.0135677.g003

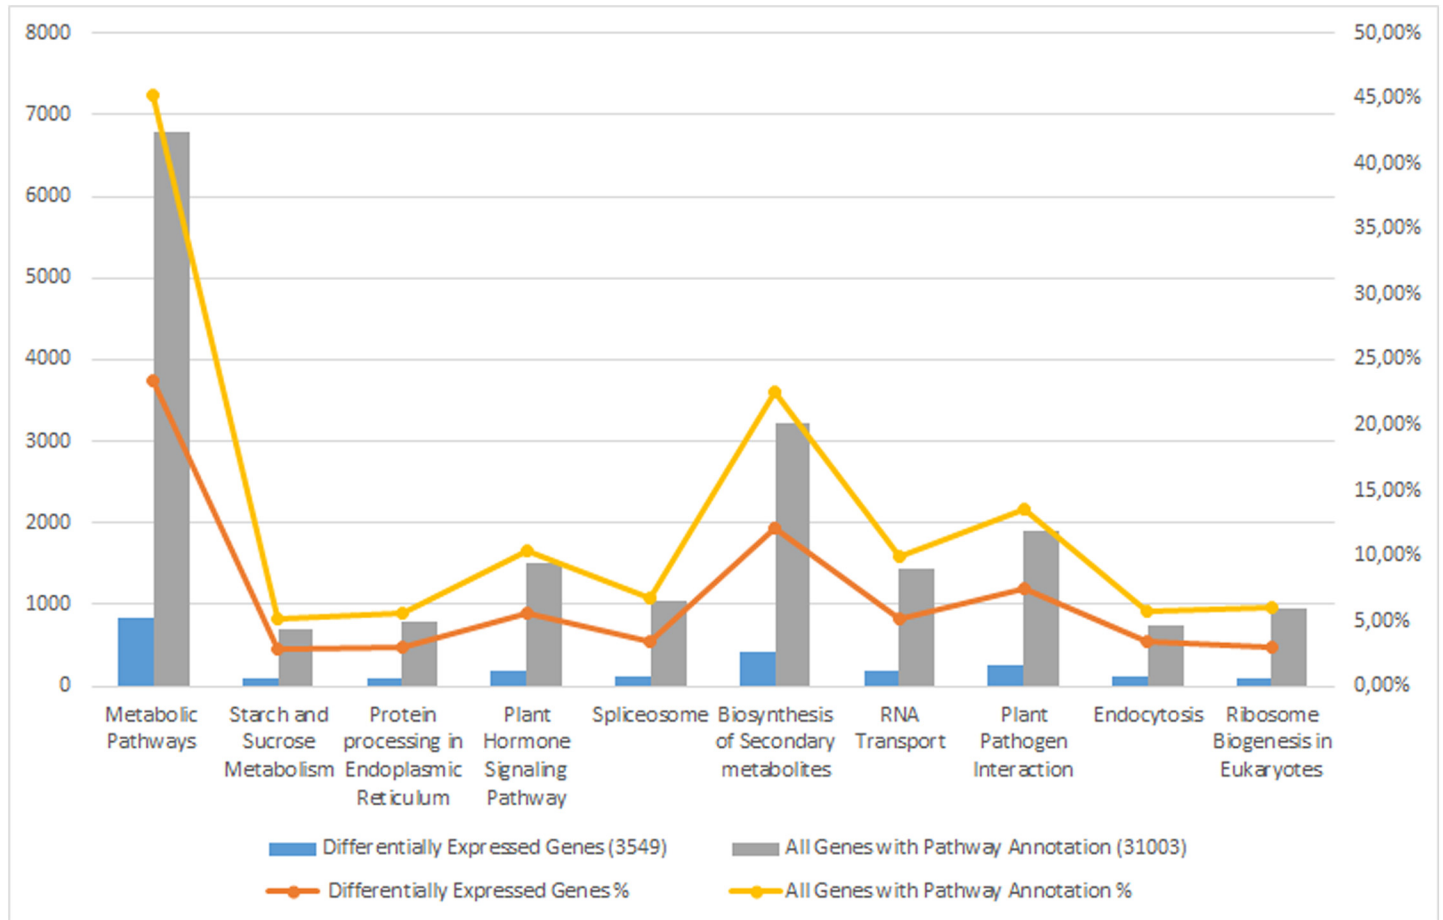

**Fig 4. KEGG pathway annotation of unigenes related with Se-treated and untreated *A. chrysochlorus* calli metabolism.**

doi:10.1371/journal.pone.0135677.g004

## Discussion

Next generation sequencing technologies has been becoming a powerful technology to illuminate the new genes and their involved biochemical pathways in non-model plants. Using RNA-seq, it has become easier to attain the transcriptome data of plant tissues or cells under specific conditions. *Astragalus* plants are valuable and extensively studied because of their properties, however there is little genetic information and transcriptomes. Here we studied the transcriptome of secondary Se accumulator *A. chrysochlorus* callus tissues under selenium stimuli to bring in new perspectives to selenium accumulation and tolerance. In our study, Illumina Hi-seq sequencing generated totally 9,358,590,780 nucleotides. From these, we obtained 83,273 unigenes with a total of 93,072,751 nt in length with an average length of 1,118 nt for each unigene. Our study identified much more unigenes in *A. chrysochlorus* than that in *A. membranaceus*, a close-related plant species, in which a total of 15,167 contigs, 84,393 singletons, and 9,893 unigenes were assembled [23]. Our results identified many new genes involving in many new biochemical pathways, including Se tolerance and metabolism that have not been illuminated up to now.

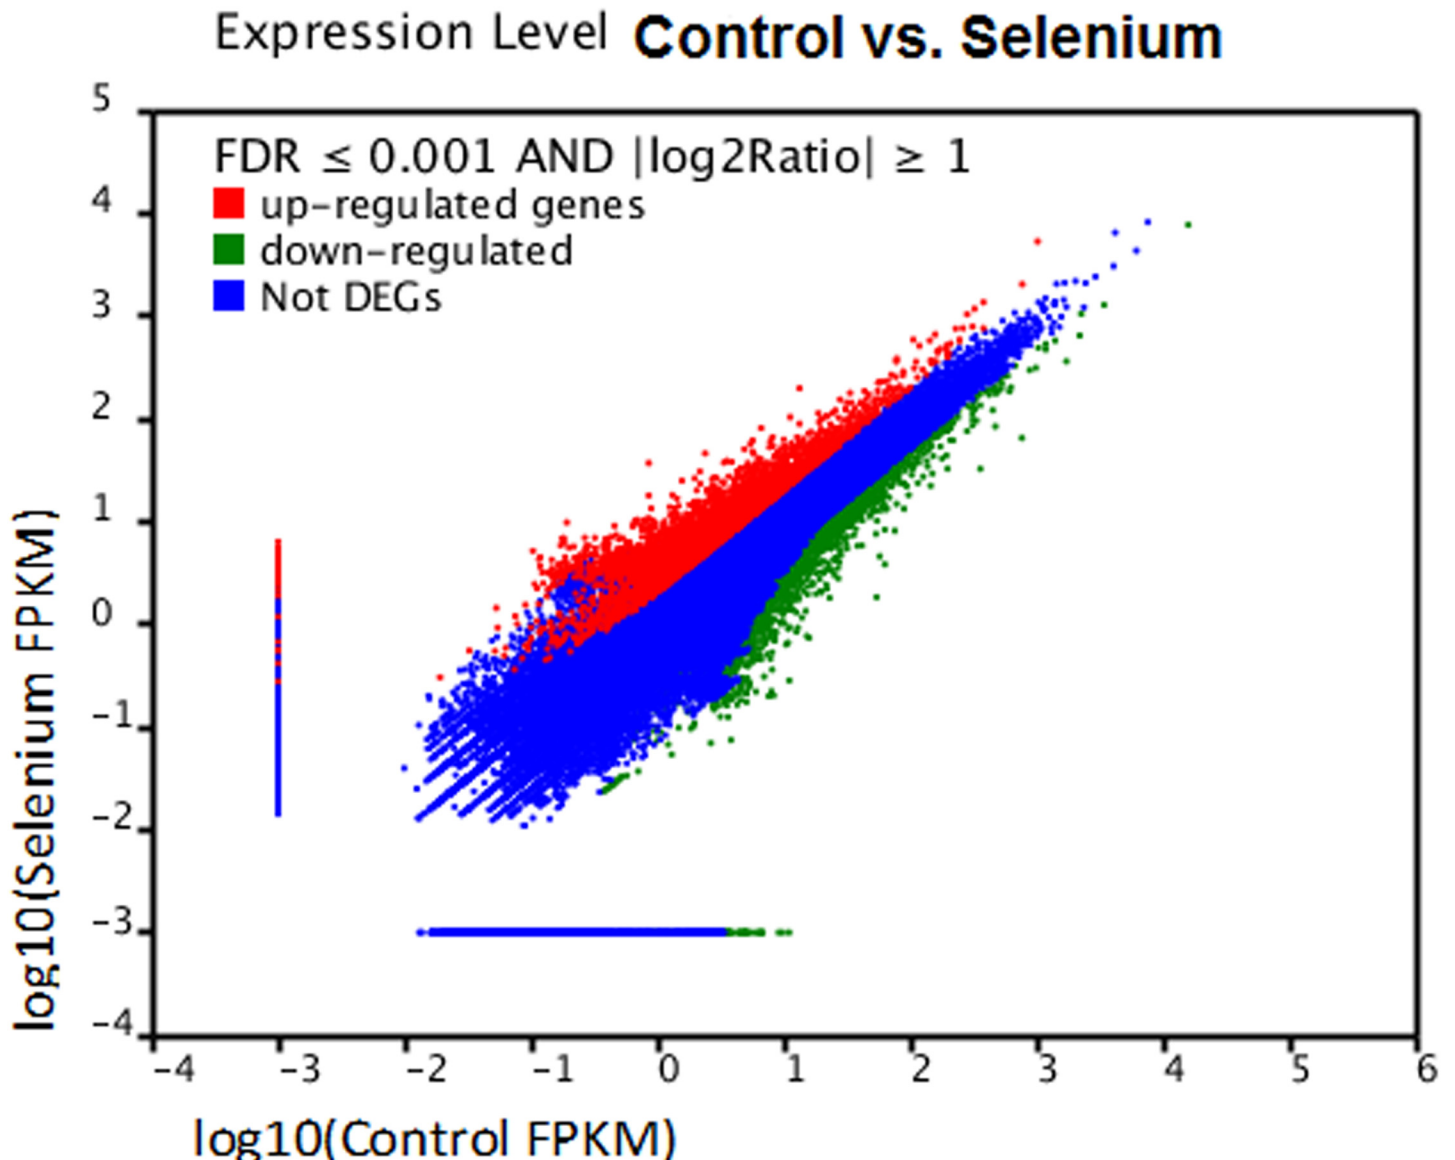

**Fig 5. Differential expression level of Se-treated and untreated *A. chrysochlorus* callus tissues.** Red and green colours represent up-regulation and down-regulation of Se-treated vs. control genes, respectively. Blue colour means not differentially expressed genes.

doi:10.1371/journal.pone.0135677.g005

### miRNAs may regulate gene expression in response to Se stimuli

In our previous study, we found that miRNAs, an important gene regulator, play a potential role in *A. chrysochlorus* during Se treatment [9]. In this study, we compared the expression of miRNAs, identified in our previous study and miRNA expression, we found the adverse relationship between the expression of miRNAs and their targets (Fig 8). During Se treatment, auxin response factor 8-like was upregulated while miR167 was downregulated; The expression of omeobox-leucine zipper protein HOX32-like, Class III HD-Zip protein, DNA (cytosine-5)-methyltransferase CMT3-like, F-box protein SKIP2-like protein was up-regulated by Se exposure but based on the degradome data, their targeting miRNAs, miR166, miR166i, miR399k,



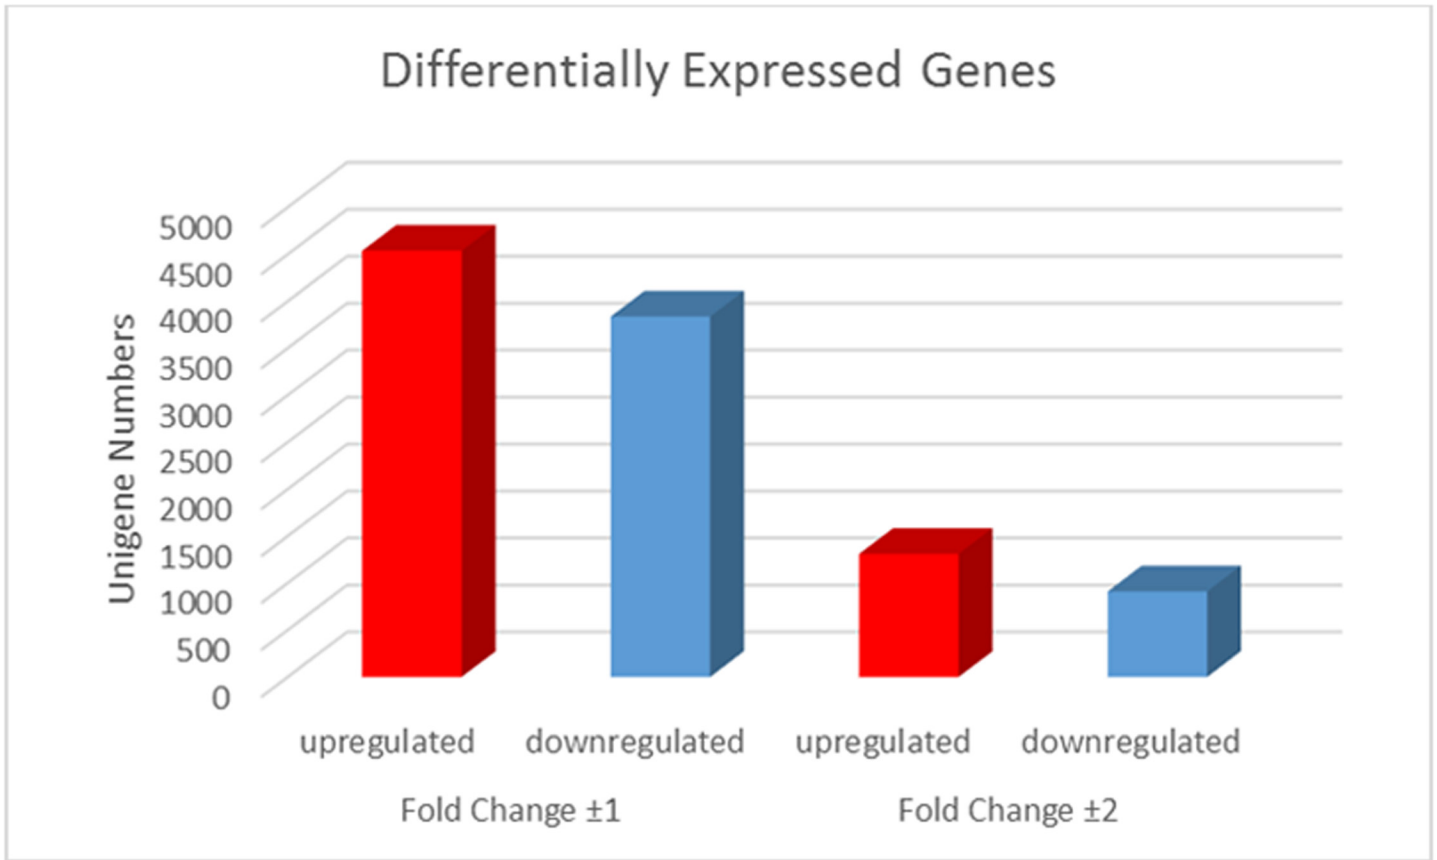

**Fig 6. The unigene numbers of Differentially Expressed Genes (DEGs).** The red bar is up-regulated genes, and the blue bar is down-regulated genes in Se-treatment vs. control sample respectively.

doi:10.1371/journal.pone.0135677.g006

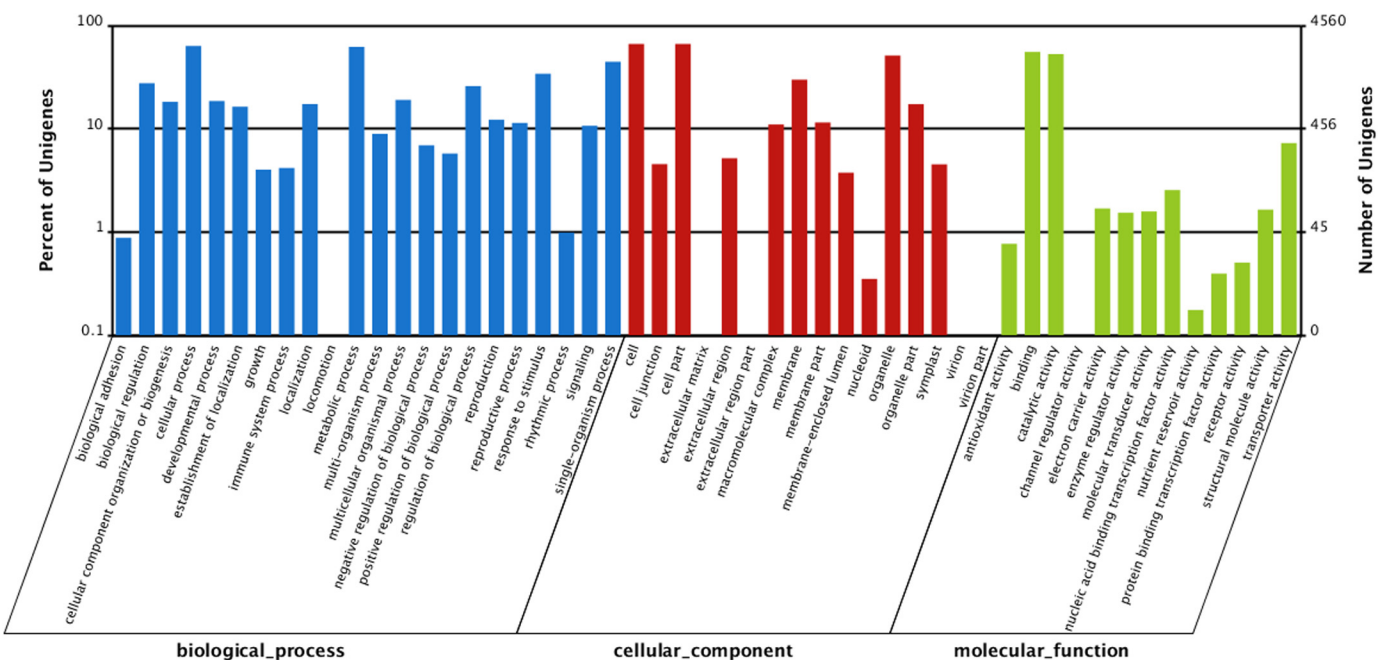

**Fig 7. GO enrichment terms as biological process, cellular component and molecular function of differentially expressed genes by Se-treatment.**

doi:10.1371/journal.pone.0135677.g007

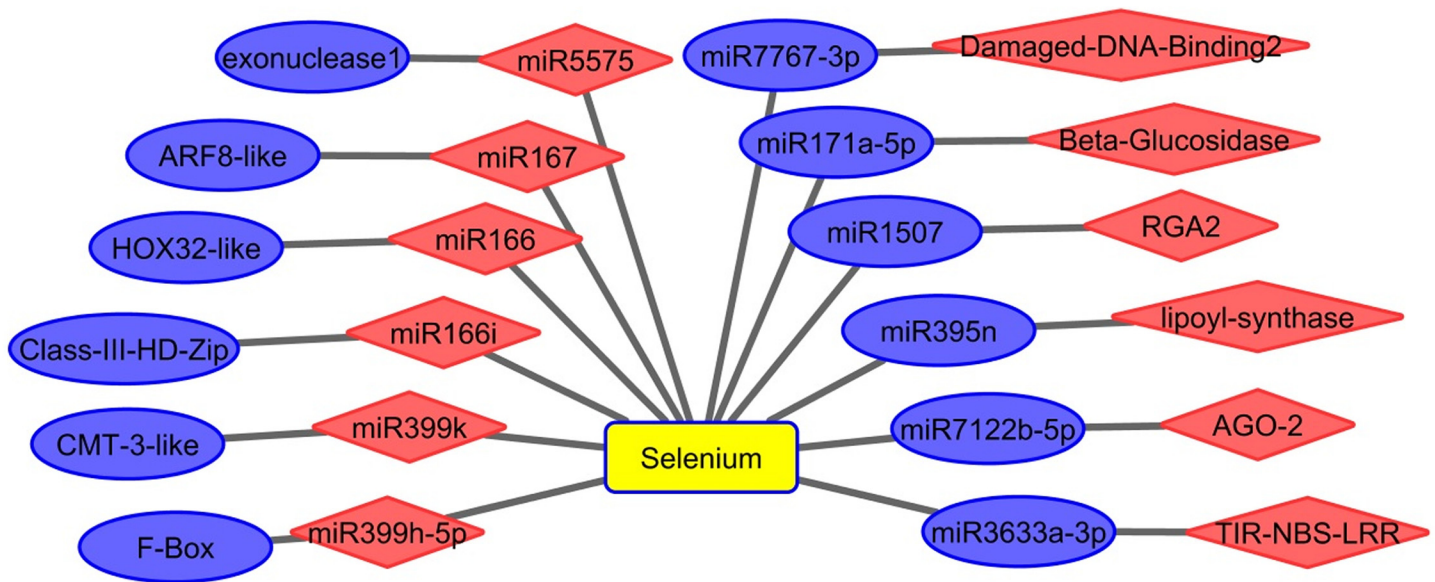

**Fig 8. Se affected miRNAs and their targets in *A. chrysochlorus* calli based on the degradome data.** ARF8 like: auxin response factor 8-like [*Glycine max*], HOX32-like protein: homeobox-leucine zipper protein HOX32-like [*Glycine max*], Class III HD Zip protein: Class III HD-Zip protein [*Medicago truncatula*], CMT-3 like protein: DNA (cytosine-5)-methyltransferase CMT3-like [*Glycine max*], F-Box: F-box protein SKIP2-like [*Glycine max*], Damage DNA Binding 2: protein DAMAGED DNA-BINDING 2 [*Glycine max*], RGA2: Disease resistance protein RGA2 [*Medicago truncatula*], AGO-2: protein argonaute 2-like [*Glycine max*], TIR- NBS-LRR: TIR-NBS-LRR RCT1 resistance protein [*Medicago truncatula*]. Blue color: upregulated, red color: downregulated.

doi:10.1371/journal.pone.0135677.g008

miR399h-5p, were down-regulated, respectively. In this study, we found that DAMAGED DNA-BINDING 2, Disease resistance protein RGA2, protein argonaute 2-like, TIR-NBS-LRR RCT1 resistance protein were repressed by Se exposure; in our previous study, we found their targeting miRNAs; miR7767-3p, miR1507, miR7122b-5p and miR3633a-3p were induced by Se treatment, respectively.

Se treatment induced the aberrant expression of many protein-coding genes in *A. chrysochlorus* callus tissues. Among the upregulated genes, there are different transcription factors, including TCP13-like (5.64 fold), bZIP transcription factor (2.96 fold), putative transcription factor bHLH041-like (2.87 fold), heat stress transcription factor A-3-like (2.84 fold), trihelix transcription factor GT-3b-like (2.74 fold), B3 domain-containing transcription factor VRN1-like (2.58 fold), probable WRKY transcription factor 32 (2.18 fold), transcription factor bHLH130-like (2.15 fold), transcription factor bZIP (2.06 fold). Another study using *Arabidopsis* found that Se treatment induced the expression of ethylene responsive factors and WRKY family transcription factors, Myb15 and zinc finger proteins [24]. It is known that these kinds of transcription factors are related to plant development as well as plant response to different types of stresses. In our study, we found that selenate treatment resulted in down regulation of ethylene responsive factors. Another upregulated genes were auxin responsive factors such as auxin-responsive protein IAA30-like (3.06 fold), auxin response factor 2-like (2.52 fold), auxin response factor 5-like (2.02 fold). Van Hoewyk et al. [24] found that selenate treatment decreased the level of auxin responsive proteins and this way reduced the plant development. However, in our study, auxin-responsive protein IAA30 was upregulated and it is a transcription factor that represses the early auxin responsive genes at low levels of auxins, even so auxin responsive factor 2-like and auxin responsive factor 5-like proteins seem to be upregulated. Auxin responsive factor 2 is known to be transcription activator/repressor that activates/represses early auxin responsive genes. These early auxin responsive genes are related to plant

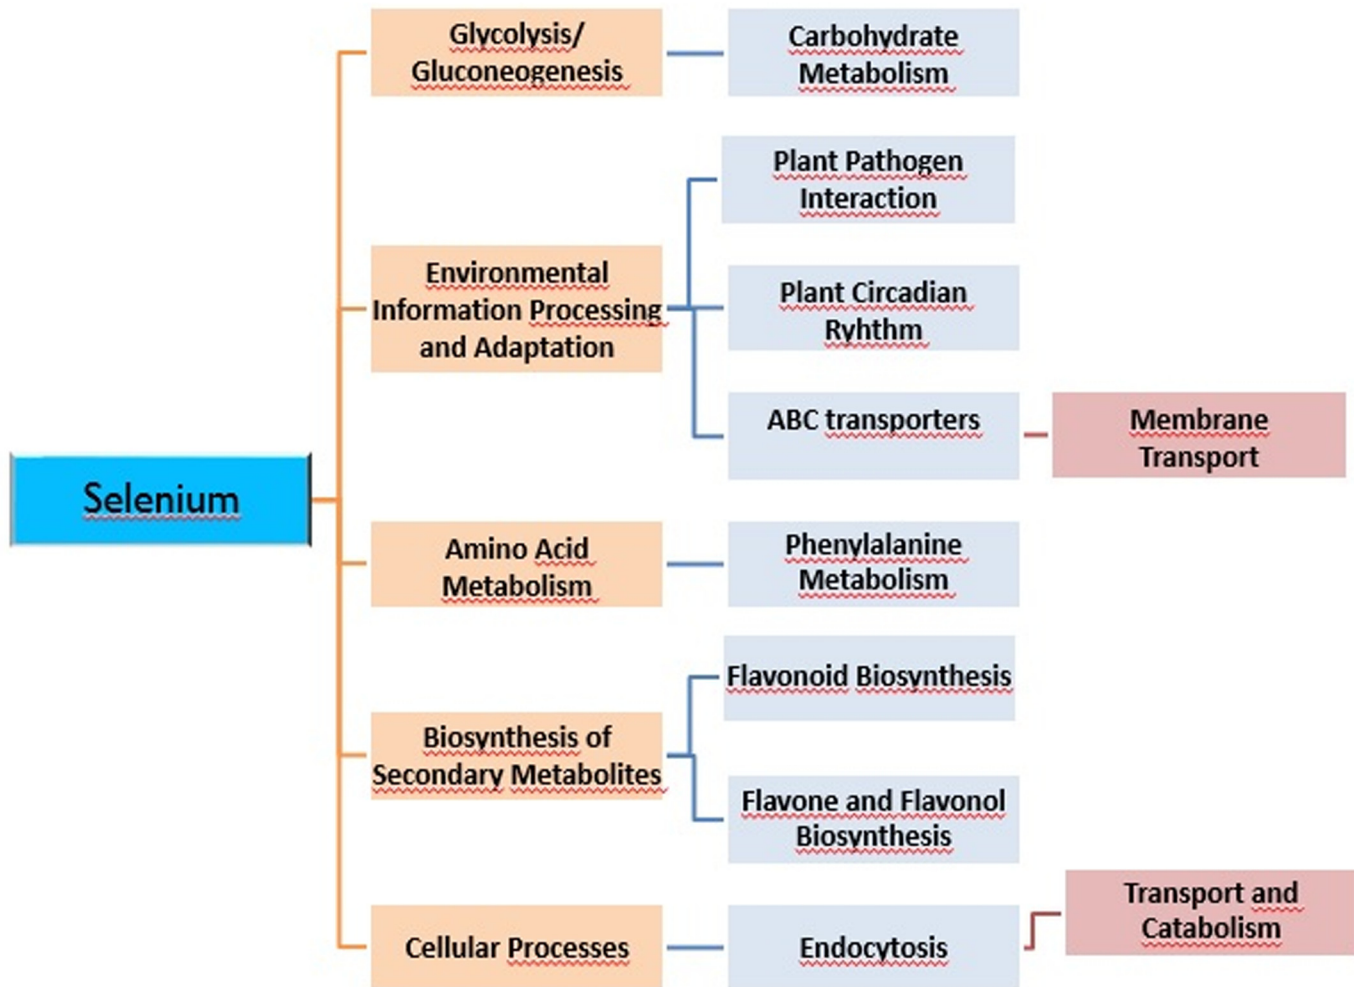

**Fig 9. Significantly affected metabolisms of *A. chrysochlorus* callus tissues with selenium treatment according to KEGG pathway analysis.**

doi:10.1371/journal.pone.0135677.g009

growth and development [25]. However auxin responsive factor 5 is known to be a transcription activator. ABC transporter family proteins are known to be involved in growth, nutrition, development, abiotic stress response, and environment-plant interaction [26]. In our study ABC transporter family B member, B member 1-like, B member 1-like isoform 2, B member 11-like, B member 28-like proteins, ABC transporter family C member, C member 5-like, ABC transporter family G member, G member like-28 were all upregulated between 2 to 11 folds. On the other hand, ABC transporter family A member 2 and member 7, family G member 5 were downregulated between 2,8 and 2.03 folds. ABC transporter family proteins are involved in detoxification and transport processes in plants [26] and when considered from this aspect, it is not surprising to detect these genes in cells after selenium treatment. Se and selenocompounds could be toxic for most the plants and *Astragalus* plants are known to tolerate high levels of Se, also in our previous study, *A. chrysochlorus* was found to be secondary accumulator. Another interesting finding is the alteration in expression of disease resistance genes, cc-nbs-*lrr* (coiled-coil nucleotide-binding site leucine-rich repeat) resistance genes and tir-nbs-*lrr* (Toll/interleukin-1 receptor nucleotide-binding site leucine-rich repeat) resistance genes. These resistance proteins are involved in pathogen recognition [27]. It was found that while

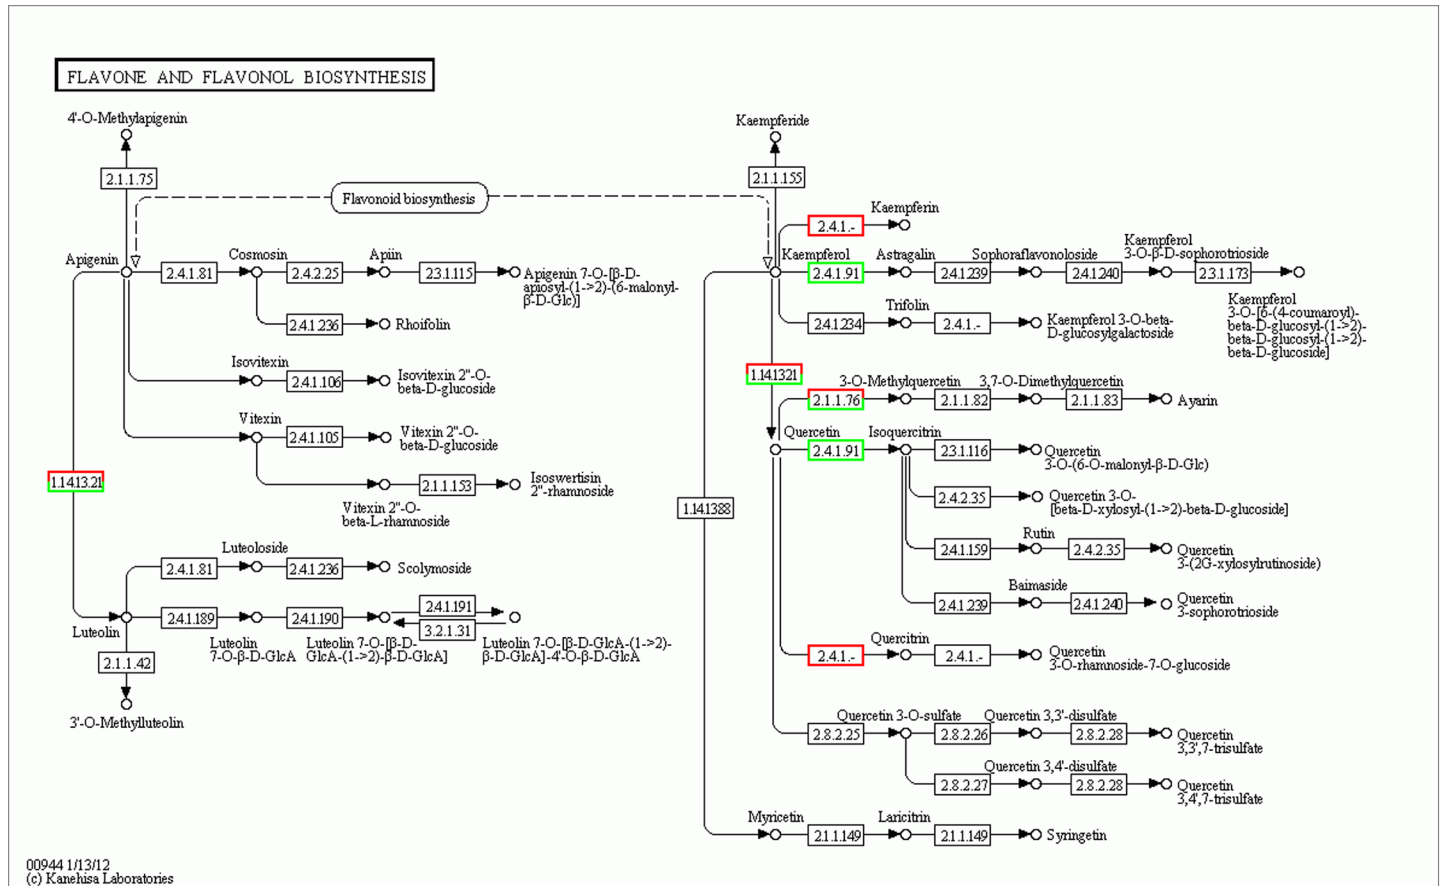

**Fig 10. Flavone and Flavonol Biosynthesis pathway involved in Se-treated *A. chrysochlorus* calli.** Red boxes and green boxes represent up-regulated and down-regulated genes, respectively.

doi:10.1371/journal.pone.0135677.g010

some of these resistance genes were upregulated, some of them were downregulated. The majority of the downregulated resistance genes were tir-nbs-lrr and cc-nbs-lrr genes. However among the upregulated ones, there were multidrug resistance ABC transporter gene, TMV resistance gene besides tir-nbs-lrr and cc-nbs-lrr genes. A study showed that several disease and stress induced proteins were upregulated in *Arabidopsis* [24]. It seems that calcium related genes were upregulated in Se treated callus tissues in *A. chrysochlorus*. The upregulated genes were annotated with calcium-dependent protein kinases, calcium-dependent protein kinase 20-like. These types of plant kinases bind calcium ions and phosphorylate metabolites which are related to many cellular mechanisms such as hormone response and stress signaling pathways [28]. Other genes related to calcium were type IIB calcium ATPase, calcium-transporting ATPase 4 plasma membrane-type-like, calcium-transporting ATPase 9 plasma membrane-type-like proteins. These proteins also are involved in adaptation to stressors by altering the calcium concentrations [29]. According to the Gene Ontology and Kyoto Encyclopedia of Genes and Genomes database pathway analysis, Se affected metabolic pathways and genes such as ABC transporters, plant pathogen interaction, phenylalanine metabolism, biosynthesis of secondary metabolites, flavone and flavonol biosynthesis, flavonoid biosynthesis, plant circadian rhythm, glycolysis/gluconeogenesis and endocytosis genes (Fig 9). The metabolites that may help to adapt the environment were thought to be produced by flavone and flavonol biosynthesis, flavonoid biosynthesis pathways (Figs 10 and 11). It seems that in flavon and



of secondary metabolites genes are affected by Se stimuli in *A. chrysochlorus*. We believe that our results enable a new intellection about elucidating the cellular processes about Se accumulation and tolerance in plants.

## Supporting Information

### S1 Fig. Sequence size of unigenes.

(XLSX)

### S1 Table. Coverage of control library sequencing.

(XLSX)

### S2 Table. Coverage of selenium library sequencing.

(XLSX)

### S3 Table. Differentially expressed genes of Se-treated and untreated *Astragalus chrysochlorus calli*.

(XLSX)

## Acknowledgments

We specially thank Bilgin Candar-Cakir for bioinformatic analyses. This work was supported by the Research Fund of The Istanbul University. Project No: 39427. O. Cakir received financial support from TUBITAK-BIDEB 2219-International Postdoctoral Research Fellowship Programme for this study. The funders had no role in study design, data collection and analysis, and decision to publish, or preparation of the manuscript.

## Author Contributions

Conceived and designed the experiments: OC NTK SA BZ. Performed the experiments: OC NTK SA BZ. Analyzed the data: OC NTK SA BZ. Contributed reagents/materials/analysis tools: OC NTK SA BZ. Wrote the paper: OC NTK SA BZ.

## References

1. Li X, Qu L, Dong Y, Han L, Liu E, Fang S, et al. A review of recent research progress on the astragalus genus. *Molecules*. 2014; 19(11):18850–80. doi: [10.3390/molecules191118850](https://doi.org/10.3390/molecules191118850) PMID: [25407722](https://pubmed.ncbi.nlm.nih.gov/25407722/).
2. Calis I, Yuruker A, Tasdemir D, Wright AD, Sticher O, Luo YD, et al. Cycloartane triterpene glycosides from the roots of *Astragalus melanophurarius*. *Planta medica*. 1997; 63(2):183–6. PMID: [9140236](https://pubmed.ncbi.nlm.nih.gov/9140236/).
3. Bedir E, Calis I, Aquino R, Piacente S, Pizza C. Cycloartane triterpene glycosides from the roots of *Astragalus brachypterus* and *Astragalus microcephalus*. *Journal of natural products*. 1998; 61(12):1469–72. doi: [10.1021/hp9801763](https://doi.org/10.1021/hp9801763) PMID: [9868145](https://pubmed.ncbi.nlm.nih.gov/9868145/).
4. Shrift A, Virupaksha TK. Seleno-Amino Acids in Selenium-Accumulating Plants. *Biochimica et biophysica acta*. 1965; 100:65–75. PMID: [14323650](https://pubmed.ncbi.nlm.nih.gov/14323650/).
5. Freeman JL, Zhang LH, Marcus MA, Fakra S, McGrath SP, Pilon-Smits EA. Spatial imaging, speciation, and quantification of selenium in the hyperaccumulator plants *Astragalus bisulcatus* and *Stanleya pinnata*. *Plant physiology*. 2006; 142(1):124–34. doi: [10.1104/pp.106.081158](https://doi.org/10.1104/pp.106.081158) PMID: [16920881](https://pubmed.ncbi.nlm.nih.gov/16920881/); PubMed Central PMCID: PMC1557614.
6. Pickering IJ, Wright C, Bubner B, Ellis D, Persans MW, Yu EY, et al. Chemical form and distribution of selenium and sulfur in the selenium hyperaccumulator *Astragalus bisulcatus*. *Plant physiology*. 2003; 131(3):1460–7. doi: [10.1104/pp.014787](https://doi.org/10.1104/pp.014787) PMID: [12644695](https://pubmed.ncbi.nlm.nih.gov/12644695/); PubMed Central PMCID: PMC166905.
7. Arı Ş, Çakır Ö, Turgut-Kara N. Selenium tolerance in *Astragalus chrysochlorus*: identification of a cDNA fragment encoding a putative Selenocysteine methyltransferase. *Acta physiologiae plantarum*. 2010; 32:1085–92.
8. Çakır Ö, Arı Ş. Cloning and molecular characterization of selenocysteine methyltransferase (AchSMT) cDNA from *Astragalus chrysochlorus*. *Plant omics journal*. 2013; 6(2):100–6.

9. Cakir O, Candar-Cakir B, Zhang B. Small RNA and degradome sequencing reveals important micro-RNA function in *Astragalus chrysochlorus* response to selenium stimuli. *Plant biotechnology journal*. 2015. doi: [10.1111/pbi.12397](https://doi.org/10.1111/pbi.12397) PMID: [25998129](https://pubmed.ncbi.nlm.nih.gov/25998129/).
10. Hung CY, Holliday BM, Kaur H, Yadav R, Kittur FS, Xie J. Identification and characterization of selenate- and selenite-responsive genes in a Se-hyperaccumulator *Astragalus racemosus*. *Molecular biology reports*. 2012; 39(7):7635–46. doi: [10.1007/s11033-012-1598-8](https://doi.org/10.1007/s11033-012-1598-8) PMID: [22362314](https://pubmed.ncbi.nlm.nih.gov/22362314/).
11. Schiavon M, Pilon M, Malagoli M, Pilon-Smits EA. Exploring the importance of sulfate transporters and ATP sulphurylases for selenium hyperaccumulation—a comparison of *Stanleya pinnata* and *Brassica juncea* (Brassicaceae). *Frontiers in plant science*. 2015; 6:2. doi: [10.3389/fpls.2015.00002](https://doi.org/10.3389/fpls.2015.00002) PMID: [25688247](https://pubmed.ncbi.nlm.nih.gov/25688247/); PubMed Central PMCID: PMC4304243.
12. Cappa JJ, Yetter C, Fakra S, Cappa PJ, DeTar R, Landes C, et al. Evolution of selenium hyperaccumulation in *Stanleya* (Brassicaceae) as inferred from phylogeny, physiology and X-ray microprobe analysis. *The New phytologist*. 2015; 205(2):583–95. doi: [10.1111/nph.13071](https://doi.org/10.1111/nph.13071) PMID: [25262627](https://pubmed.ncbi.nlm.nih.gov/25262627/).
13. Alford ER, Lindblom SD, Pittarello M, Freeman JL, Fakra SC, Marcus MA, et al. Roles of rhizobial symbionts in selenium hyperaccumulation in *Astragalus* (Fabaceae). *American journal of botany*. 2014; 101(11):1895–905. doi: [10.3732/ajb.1400223](https://doi.org/10.3732/ajb.1400223) PMID: [25366855](https://pubmed.ncbi.nlm.nih.gov/25366855/).
14. Sura-de Jong M, Reynolds RJ, Richterova K, Musilova L, Staicu LC, Chocholata I, et al. Selenium hyperaccumulators harbor a diverse endophytic bacterial community characterized by high selenium resistance and plant growth promoting properties. *Frontiers in plant science*. 2015; 6:113. doi: [10.3389/fpls.2015.00113](https://doi.org/10.3389/fpls.2015.00113) PMID: [25784919](https://pubmed.ncbi.nlm.nih.gov/25784919/); PubMed Central PMCID: PMC4345804.
15. Strickler SR, Bombarely A, Mueller LA. Designing a transcriptome next-generation sequencing project for a nonmodel plant species. *Am J Bot*. 2012; 99(2):257–66. doi: [10.3732/ajb.1100292](https://doi.org/10.3732/ajb.1100292) PMID: [22268224](https://pubmed.ncbi.nlm.nih.gov/22268224/).
16. Turgut-Kara N, Kahraman BÜ. Effects of long-term culture of *Astragalus chrysochlorus* callus on morphology, genetic structure, gene expression and metabolism. *Plant biosystems*. 2015; 149(2):329–36. doi: [10.1080/11263504.2013.824518](https://doi.org/10.1080/11263504.2013.824518)
17. Grabherr MG, Haas BJ, Yassour M, Levin JZ, Thompson DA, Amit I, et al. Full-length transcriptome assembly from RNA-Seq data without a reference genome. *Nature biotechnology*. 2011; 29(7):644–52. doi: [10.1038/nbt.1883](https://doi.org/10.1038/nbt.1883) PMID: [21572440](https://pubmed.ncbi.nlm.nih.gov/21572440/); PubMed Central PMCID: PMC3571712.
18. Pertea G, Huang X, Liang F, Antonescu V, Sultana R, Karamycheva S, et al. TIGR Gene Indices clustering tools (TGICL): a software system for fast clustering of large EST datasets. *Bioinformatics*. 2003; 19(5):651–2. PMID: [12651724](https://pubmed.ncbi.nlm.nih.gov/12651724/).
19. Machado M, Magalhaes WC, Sene A, Araujo B, Faria-Campos AC, Chanock SJ, et al. Phred-Phrap package to analyses tools: a pipeline to facilitate population genetics re-sequencing studies. *Investigative genetics*. 2011; 2(1):3. doi: [10.1186/2041-2223-2-3](https://doi.org/10.1186/2041-2223-2-3) PMID: [21284835](https://pubmed.ncbi.nlm.nih.gov/21284835/); PubMed Central PMCID: PMC3041995.
20. Iseli C, Jongeneel CV, Bucher P. ESTScan: a program for detecting, evaluating, and reconstructing potential coding regions in EST sequences. *Proceedings / International Conference on Intelligent Systems for Molecular Biology; ISMB International Conference on Intelligent Systems for Molecular Biology*. 1999:138–48. PMID: [10786296](https://pubmed.ncbi.nlm.nih.gov/10786296/).
21. Conesa A, Gotz S, Garcia-Gomez JM, Terol J, Talon M, Robles M. Blast2GO: a universal tool for annotation, visualization and analysis in functional genomics research. *Bioinformatics*. 2005; 21(18):3674–6. doi: [10.1093/bioinformatics/bti610](https://doi.org/10.1093/bioinformatics/bti610) PMID: [16081474](https://pubmed.ncbi.nlm.nih.gov/16081474/).
22. Mortazavi A, Williams BA, McCue K, Schaeffer L, Wold B. Mapping and quantifying mammalian transcriptomes by RNA-Seq. *Nature methods*. 2008; 5(7):621–8. doi: [10.1038/nmeth.1226](https://doi.org/10.1038/nmeth.1226) PMID: [18516045](https://pubmed.ncbi.nlm.nih.gov/18516045/).
23. Liu XB, Ma L, Zhang AH, Zhang YH, Jiang J, Ma W, et al. High-throughput analysis and characterization of *Astragalus membranaceus* transcriptome using 454 GS FLX. *PLoS one*. 2014; 9(5):e95831. doi: [10.1371/journal.pone.0095831](https://doi.org/10.1371/journal.pone.0095831) PMID: [24828103](https://pubmed.ncbi.nlm.nih.gov/24828103/); PubMed Central PMCID: PMC4020759.
24. Van Hoewyk D, Takahashi H, Inoue E, Hess A, Tamaoki M, Pilon-Smits EA. Transcriptome analyses give insights into selenium-stress responses and selenium tolerance mechanisms in *Arabidopsis*. *Physiol Plant*. 2008; 132(2):236–53. doi: [10.1111/j.1399-3054.2007.01002.x](https://doi.org/10.1111/j.1399-3054.2007.01002.x) PMID: [18251864](https://pubmed.ncbi.nlm.nih.gov/18251864/).
25. Okushima Y, Mitina I, Quach HL, Theologis A. AUXIN RESPONSE FACTOR 2 (ARF2): a pleiotropic developmental regulator. *The Plant journal: for cell and molecular biology*. 2005; 43(1):29–46. doi: [10.1111/j.1365-313X.2005.02426.x](https://doi.org/10.1111/j.1365-313X.2005.02426.x) PMID: [15960614](https://pubmed.ncbi.nlm.nih.gov/15960614/).
26. Kang J, Park J, Choi H, Burla B, Kretschmar T, Lee Y, et al. Plant ABC Transporters. *The Arabidopsis book / American Society of Plant Biologists*. 2011; 9:e0153. doi: [10.1199/tab.0153](https://doi.org/10.1199/tab.0153) PMID: [22303277](https://pubmed.ncbi.nlm.nih.gov/22303277/); PubMed Central PMCID: PMC3268509.

27. McHale L, Tan X, Koehl P, Michelmore RW. Plant NBS-LRR proteins: adaptable guards. *Genome biology*. 2006; 7(4):212. doi: [10.1186/gb-2006-7-4-212](https://doi.org/10.1186/gb-2006-7-4-212) PMID: [16677430](https://pubmed.ncbi.nlm.nih.gov/16677430/); PubMed Central PMCID: PMC1557992.
28. Valmonte GR, Arthur K, Higgins CM, MacDiarmid RM. Calcium-dependent protein kinases in plants: evolution, expression and function. *Plant & cell physiology*. 2014; 55(3):551–69. doi: [10.1093/pcp/pct200](https://doi.org/10.1093/pcp/pct200) PMID: [24363288](https://pubmed.ncbi.nlm.nih.gov/24363288/).
29. Kabala K, Klobus G. Plant Ca<sup>2+</sup>-ATPases. *Acta physiologiae plantarum*. 2005; 27(4A):559–74.
30. Winkel-Shirley B. Biosynthesis of flavonoids and effects of stress. *Current opinion in plant biology*. 2002; 5(3):218–23. PMID: [11960739](https://pubmed.ncbi.nlm.nih.gov/11960739/).
